# Supplementary material for: Chitosan-coated magnetic nanorods and nanospheres: physicochemical characterizations and potential as methotrexate carriers for targeted drug delivery
Source: publisher site journal article supplement (doi:10.1515/zpch-2023-0389), 2023-11-29
Supplement: Supplementary file 1 [file j_zpch-2023-0389_suppl_001.docx]

Supplementary materials

**Chitosan-Coated Magnetic Nanorods and Nanospheres: Physicochemical Characterizations and Potential as Methotrexate Carriers for Targeted Drug Delivery**

Seyedeh-Masoumeh Taghizadeh, Neha Lal, Mahboubeh Karami-Darehnaranji, Reza Heydari, Azadeh Hamedi, Esmaeil Mirzaei, Amir Azadi, Aydin Berenjian, Alireza Ebrahiminezhad


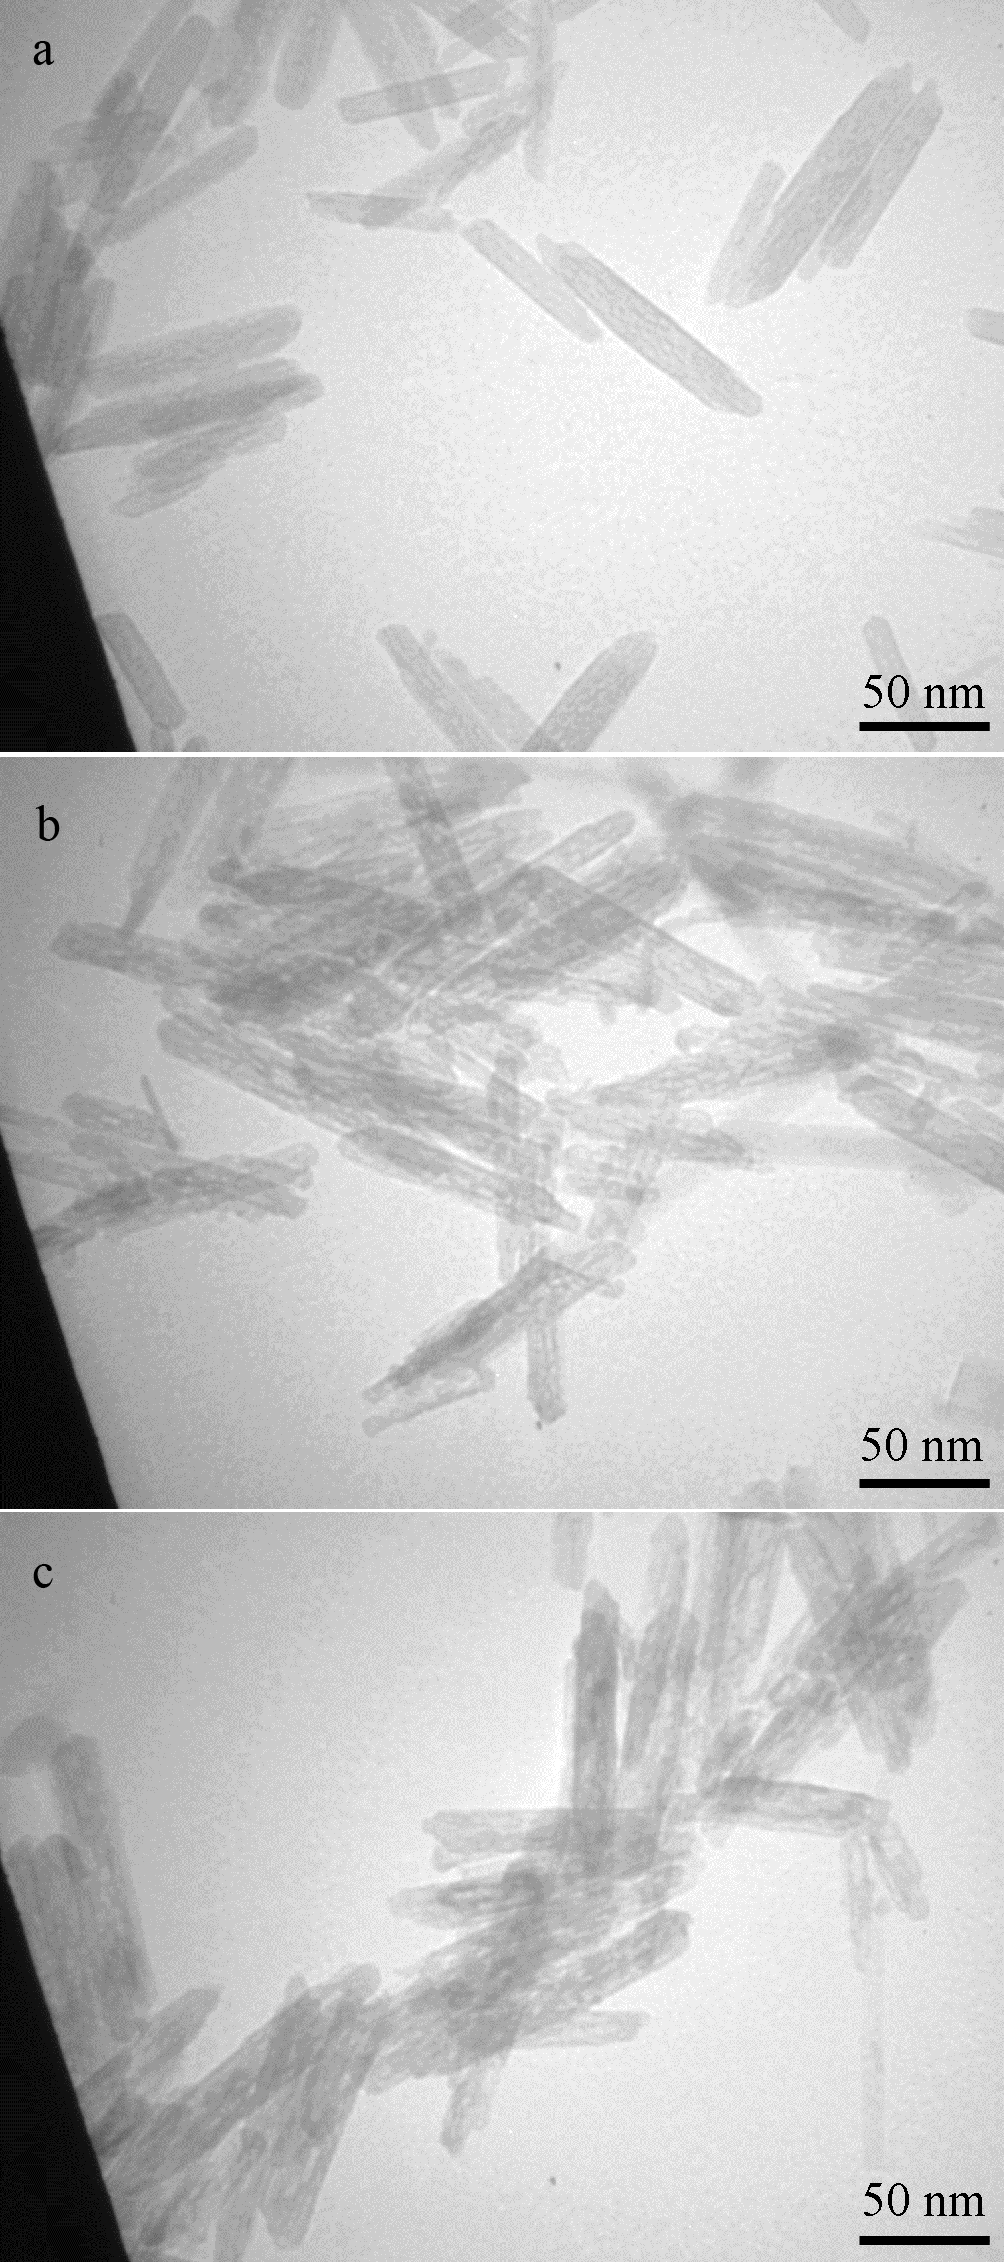


**Fig. S1** TEM micrographs of ANRs (a), MNRs (b), and C@MNRs (c)

**
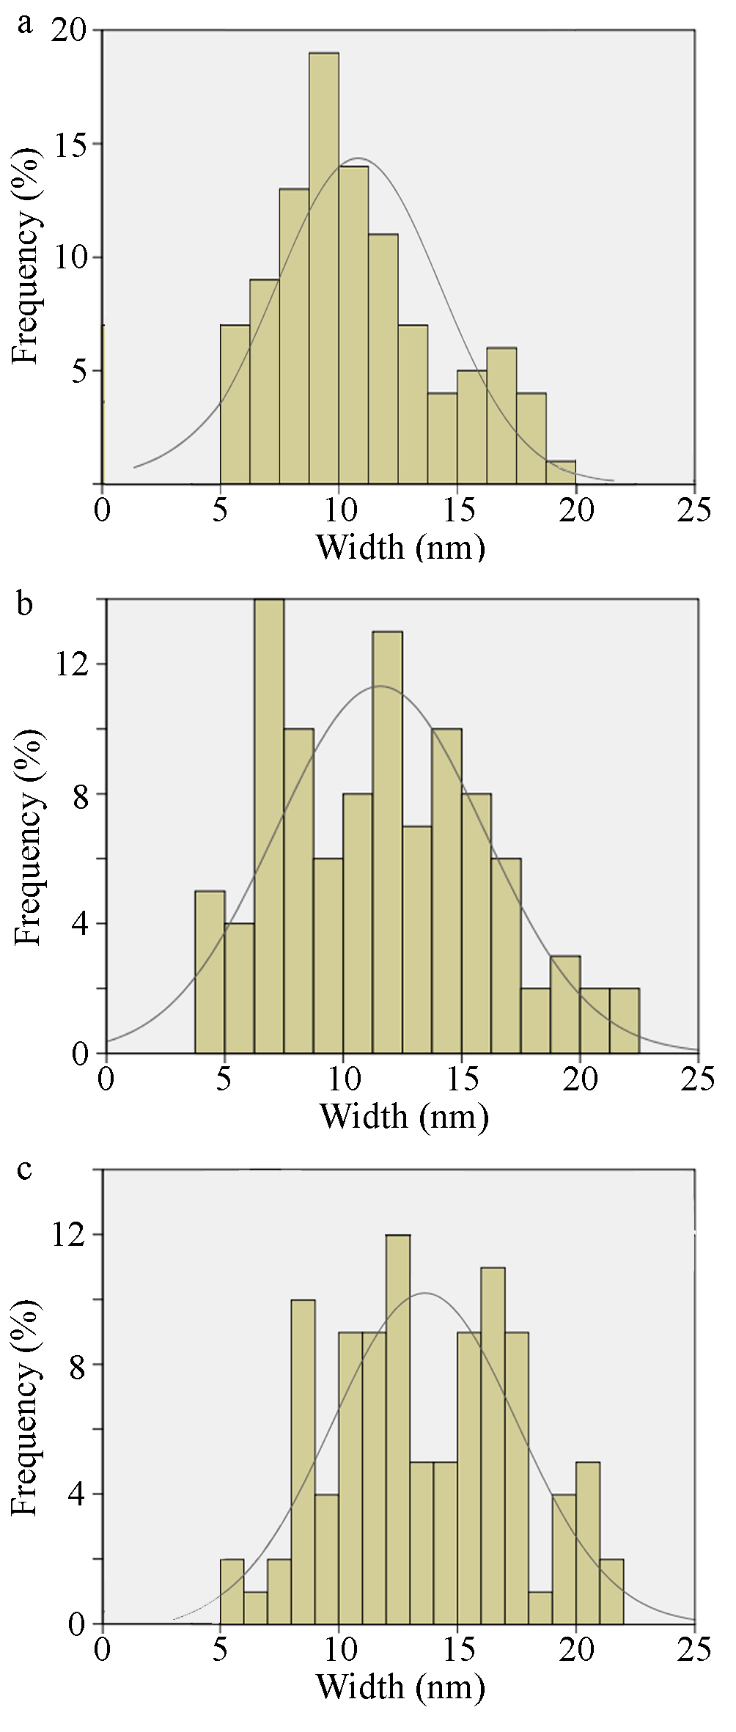
Fig. S2** Size distribution histograms of the widths of ANRs (a), MNRs (b), and C@MNRs (c)

**
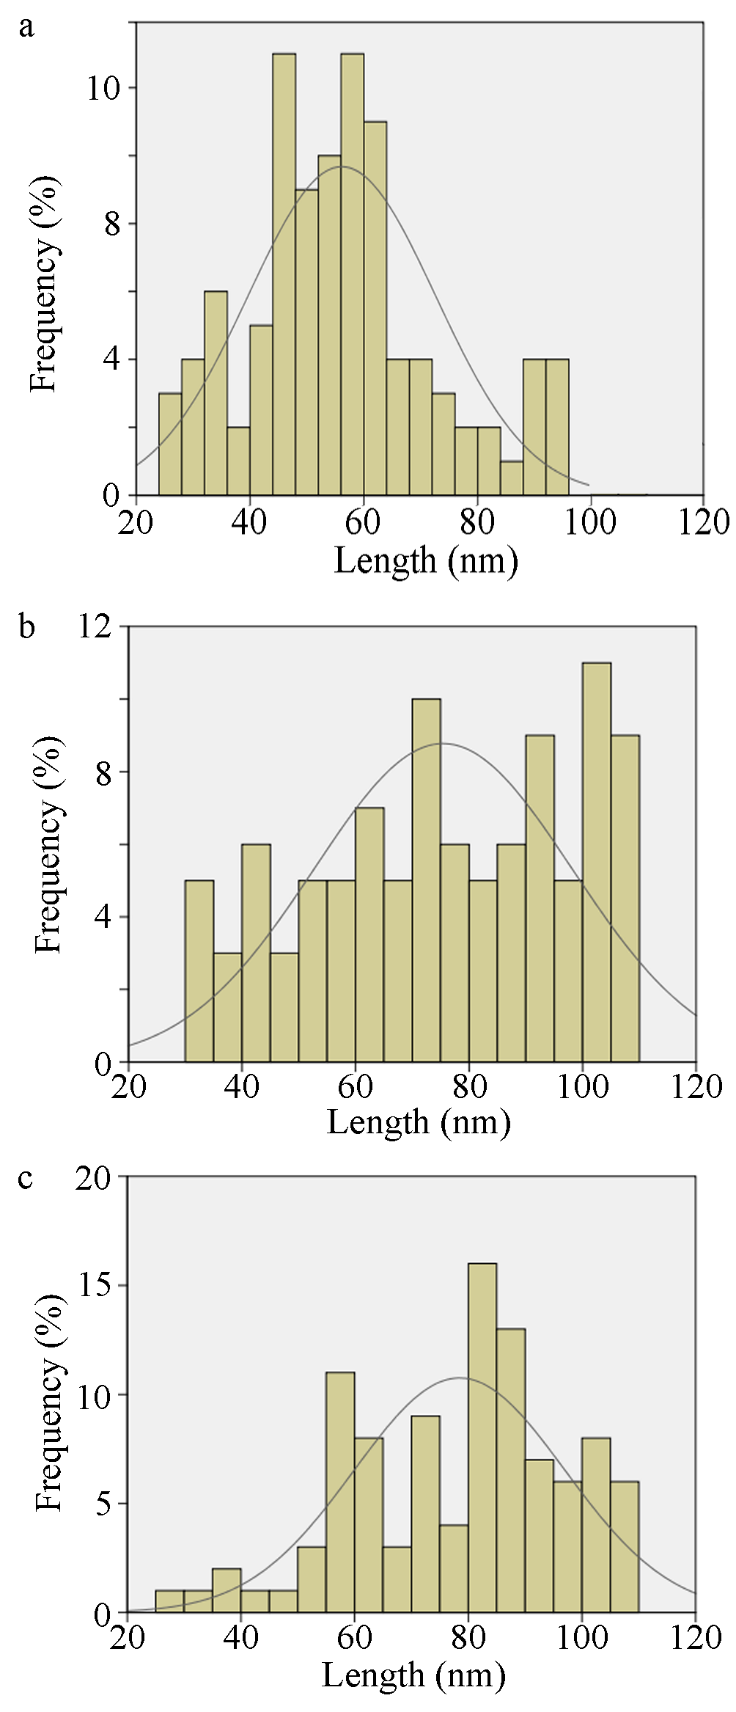
Fig. S3** Size distribution histograms of the length of ANRs (a), MNRs (b), and C@MNRs (c)
